# Supplementary material for: Contextualising the developability risk of antibodies with lambda light chains using enhanced therapeutic antibody profiling
Source: PubMed Central journal article supplement (PMC10774428; doi:10.1038/s42003-023-05744-8), 2024-01-08
Supplement: 42003_2023_5744_MOESM3_ESM.pdf [file 42003_2023_5744_MOESM3_ESM.pdf]

## **Description of Additional Supplementary Files**

**File name:** Supplementary Data 1

**Description:** Numerical source data for all figures and tables.
